# Supplementary material for: The atomic defects on the (104) and (110) surfaces of the MgCl2-supported Ziegler–Natta catalyst: a periodic DFT study
Source: Royal Society of Chemistry journal article supplement (doi:10.1039/d2cy01365g), 2022-01-01
Supplement: d2cy01365g1.pdf [file d2cy01365g1.pdf]

The atomic defects on the (104) and (110) surfaces of the MgCl<sub>2</sub>-supported Ziegler-Natta  
Catalyst: a periodic DFT study

Xing Guo,<sup>a</sup> Yunqi Shao,<sup>a</sup> Jun Luo,<sup>a</sup> Zhen Liu\*<sup>a</sup> and Boping Liu\*<sup>b</sup>

<sup>a</sup>School of Chemical Engineering, East China University of Science and Technology, Shanghai 200237, China

<sup>b</sup>College of Materials and Energy, South China Agricultural University, Guangzhou 510642, China

\*Corresponding author:

Zhen Liu, Email: [liuzhen@ecust.edu.cn](mailto:liuzhen@ecust.edu.cn)

Boping Liu, Email: [boping@scau.edu.cn](mailto:boping@scau.edu.cn)

Table S1. Bader charges of TiCl<sub>4</sub> molecule and Ti center.

| Surfaces | TiCl <sub>4</sub> | Ti center |
|----------|-------------------|-----------|
| (110)    |                   |           |
| I110     | -0.22             | 1.74      |
| D110-1   | -0.92             | 1.60      |
| D110-2   | -1.64             | 1.34      |
| D110-3   | -0.21             | 1.73      |
| (104)    |                   |           |
| I104     | -0.10             | 1.70      |
| D104-1   | -0.84             | 1.57      |
| D104-2   | -1.55             | 1.14      |
| D104-3   | -0.02             | 1.71      |

Table S2. Adsorption energies (kcal mol<sup>-1</sup>) for the TiCl<sub>4</sub> on the C110 and C104 surfaces.

| Surfaces | TiCl <sub>4</sub> |
|----------|-------------------|
| C110     | -14.2             |
| C104     | -26.8             |

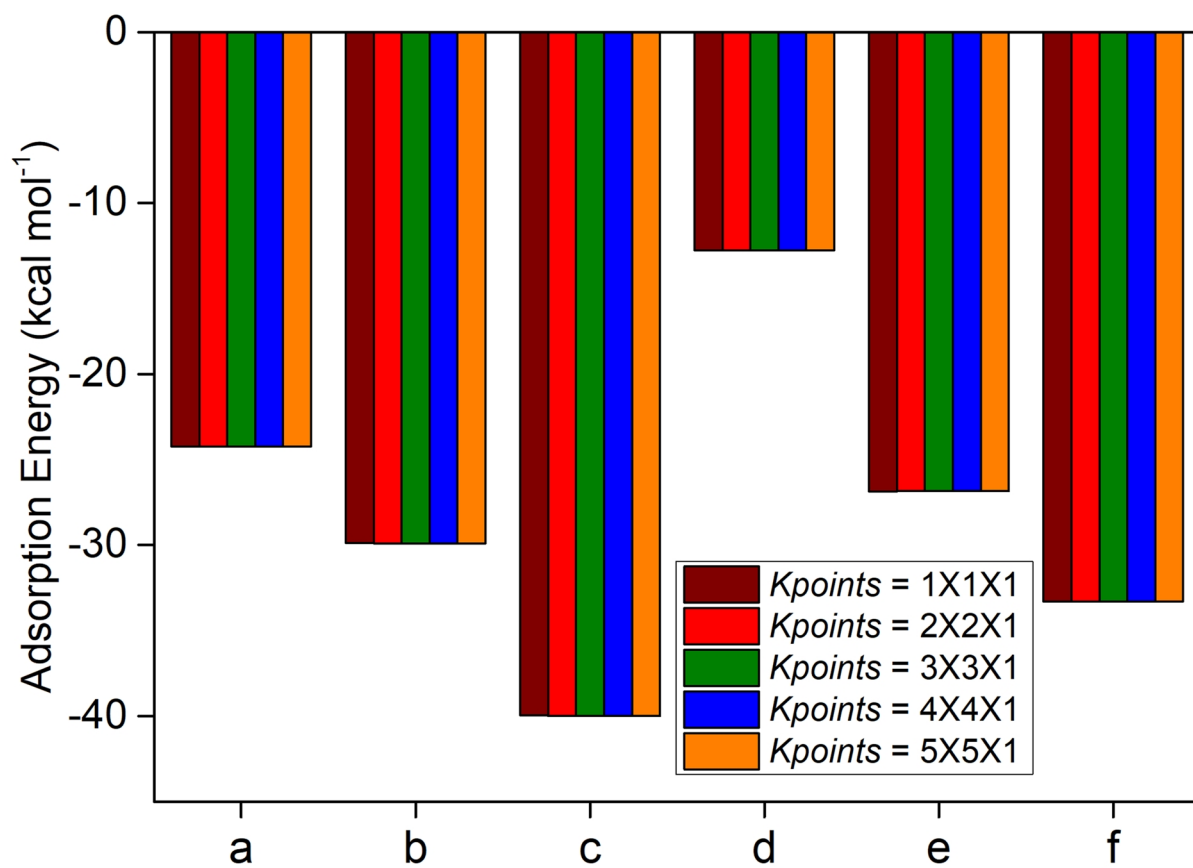

Fig. S1 Adsorption energy for (a) TiCl<sub>4</sub>/MgCl<sub>2</sub>(110), (b) EB/MgCl<sub>2</sub>(110), (c) DMDOMe/MgCl<sub>2</sub>(110), (d) TiCl<sub>4</sub>/MgCl<sub>2</sub>(104), (e) EB/MgCl<sub>2</sub>(104), and (f) DMDOMe/MgCl<sub>2</sub>(104) under different k point meshes.

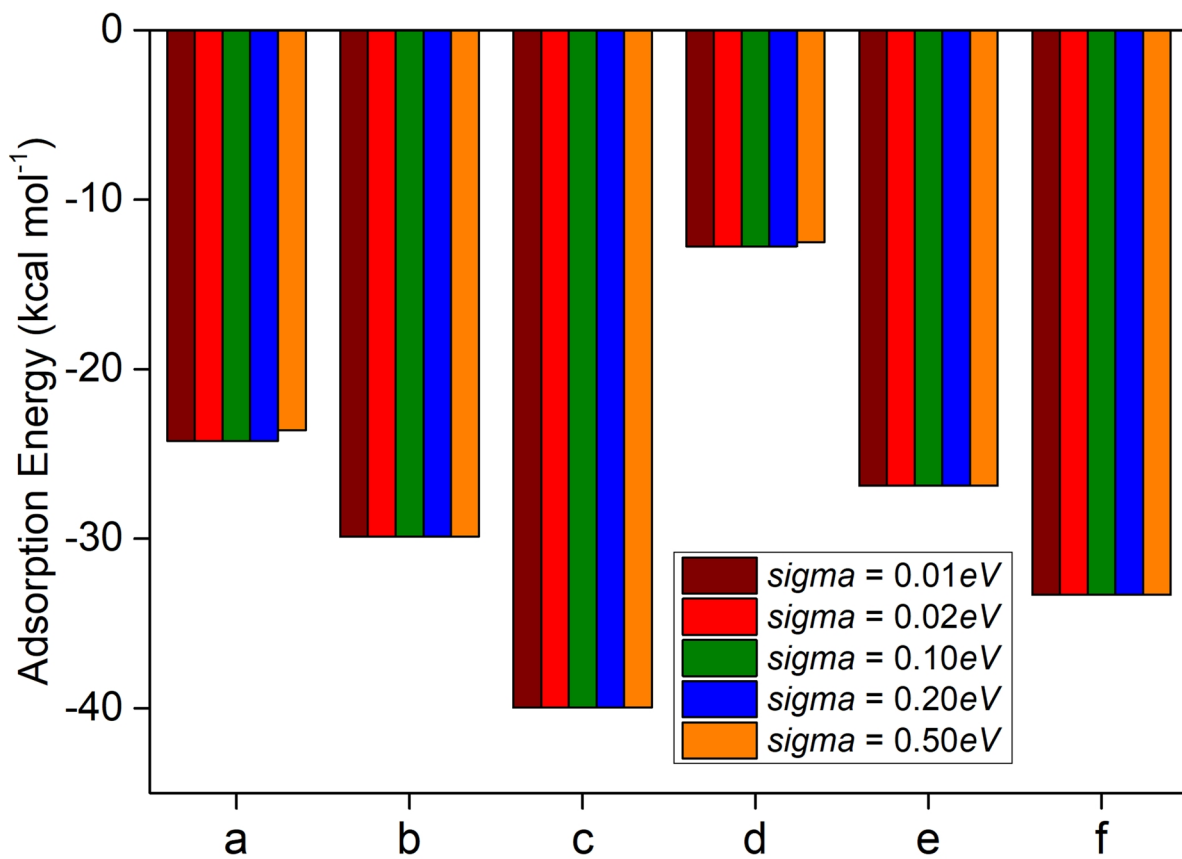

Fig. S2 Adsorption energy for (a)  $\text{TiCl}_4/\text{MgCl}_2(110)$ , (b)  $\text{EB}/\text{MgCl}_2(110)$ , (c)  $\text{DMDOMe}/\text{MgCl}_2(110)$ , (d)  $\text{TiCl}_4/\text{MgCl}_2(104)$ , (e)  $\text{EB}/\text{MgCl}_2(104)$ , and (f)  $\text{DMDOMe}/\text{MgCl}_2(104)$  under different smearing methods.

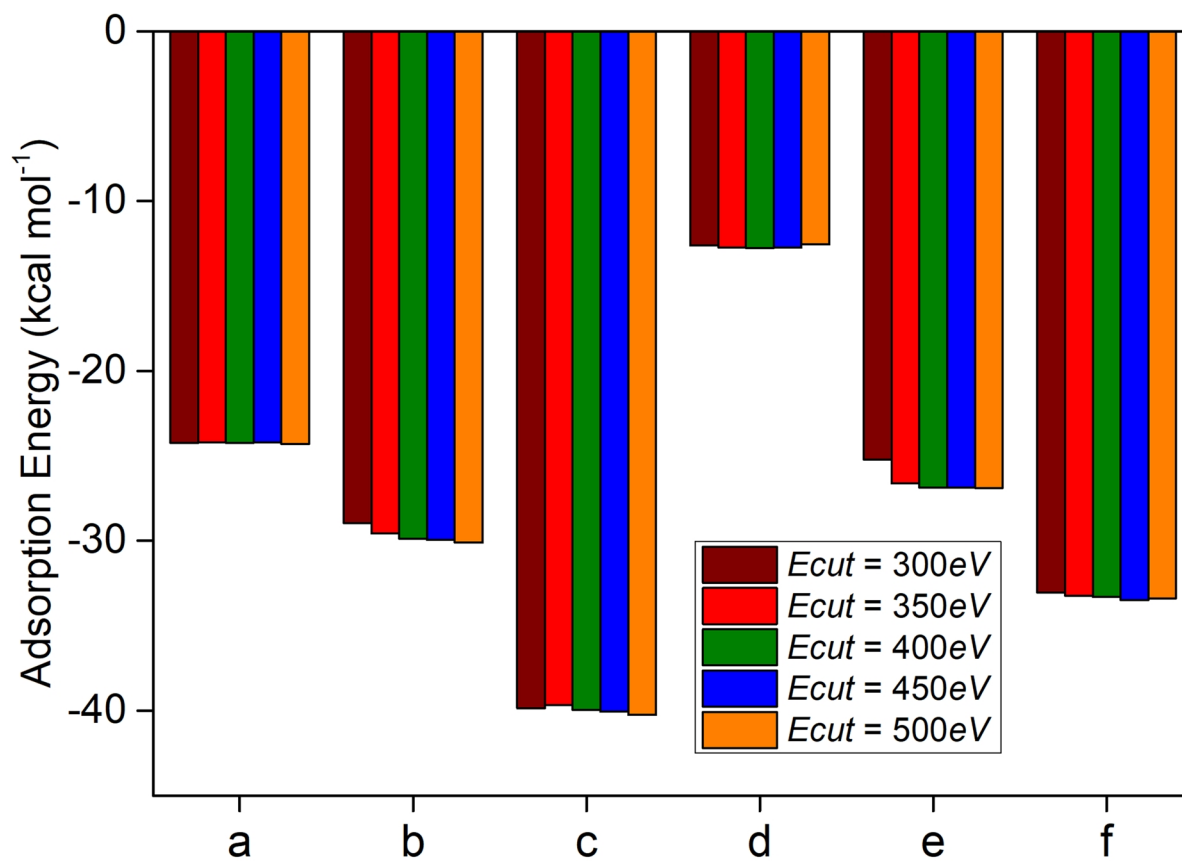

Fig. S3 Adsorption energy for (a) TiCl<sub>4</sub>/MgCl<sub>2</sub>(110), (b) EB/MgCl<sub>2</sub>(110), (c) DMDOMe/MgCl<sub>2</sub>(110), (d) TiCl<sub>4</sub>/MgCl<sub>2</sub>(104), (e) EB/MgCl<sub>2</sub>(104), and (f) DMDOMe/MgCl<sub>2</sub>(104) under different cutoff energies.

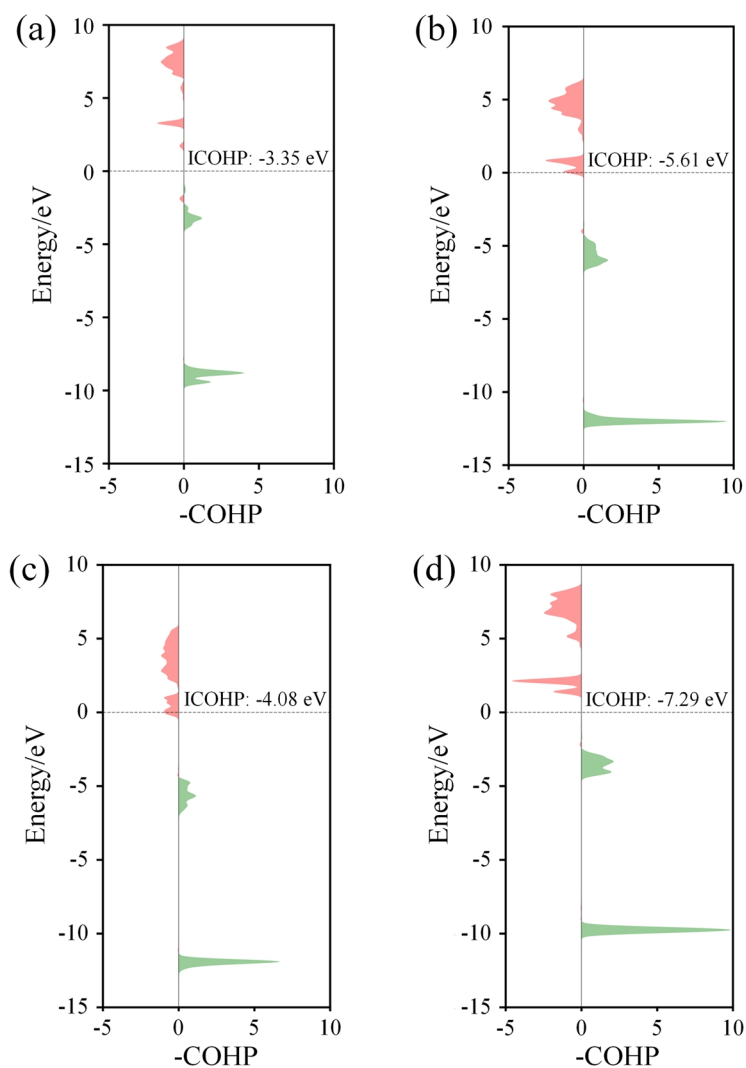

Fig. S4 The crystal orbital Hamilton population (COHP) analysis of the  $(\text{Ti-Cl})_5$  bond in (a) the I104 surface, (b) the D104-1 surface, (c) the D104-2 surface, and (d) the D104-3 surface. The Colour code for the COHP curves is as follows: green, bonding contributions; and red, antibonding contributions.

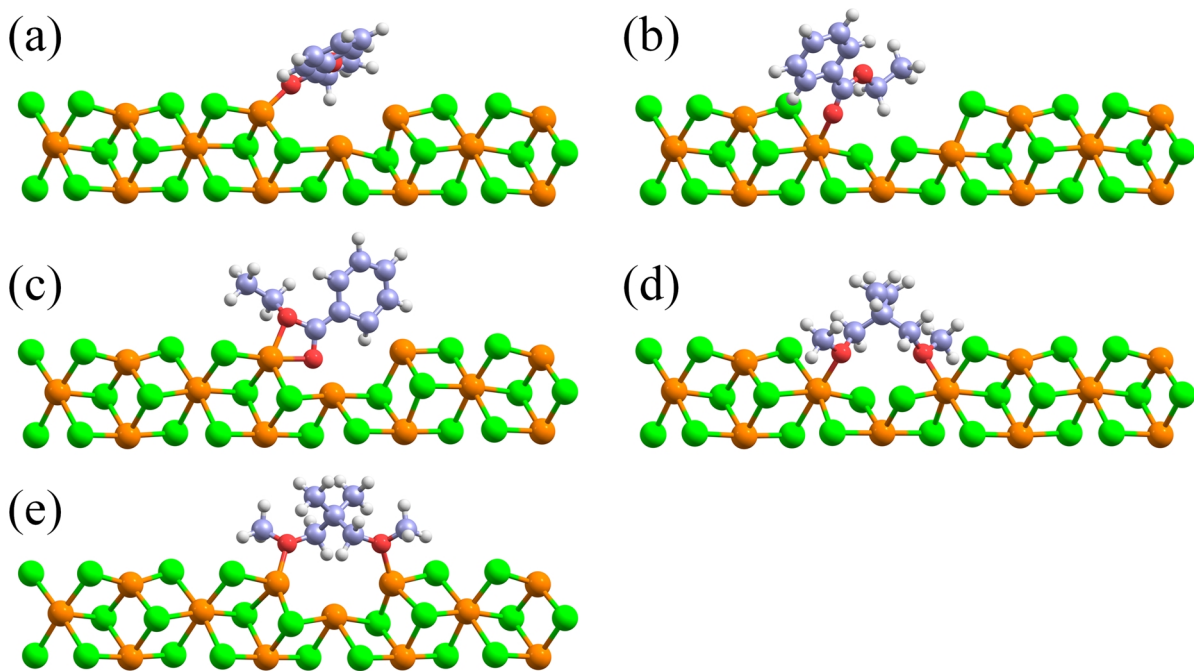

Fig. S5 The binding modes for EB and DMDOMe on: (a), (c), and (e) the D110-2 surface, and (b), and (d) the D110-3 surface. Colour code: orange, Mg; green, Cl of the MgCl<sub>2</sub>; blue, C; red, O; and light gray, H. Only the relaxed atoms are shown for clarity.

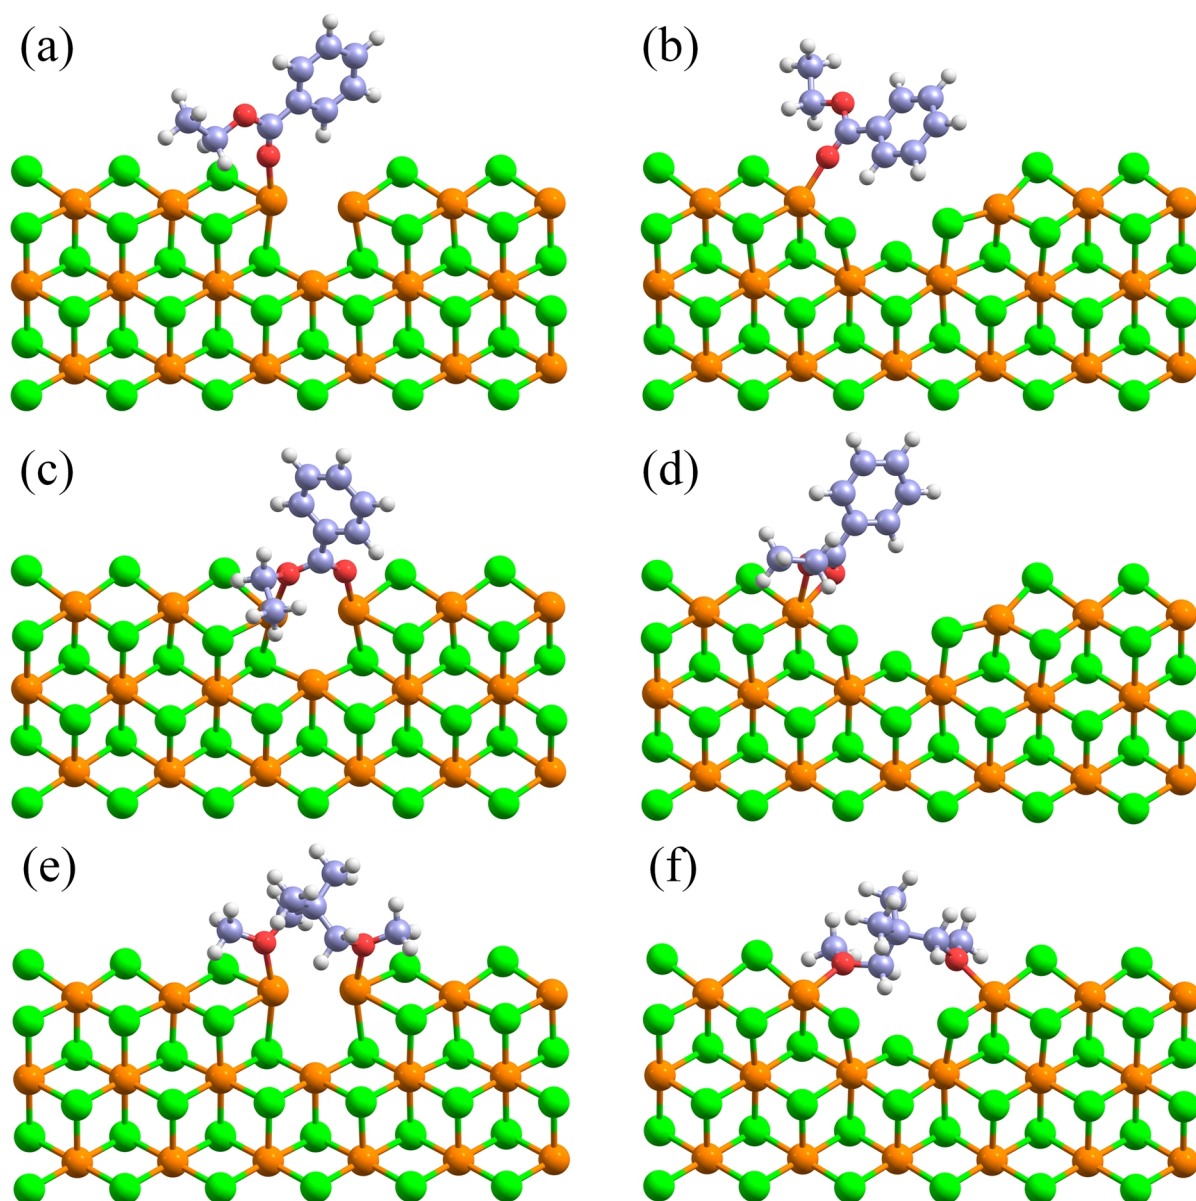

Fig. S6 The binding modes for EB and DMDOMe on: (a), (c), and (e) the D104-2 surface, and (b), (d), and (f) the D104-3 surface. Colour code: as mentioned above. Only the relaxed atoms are shown for clarity.



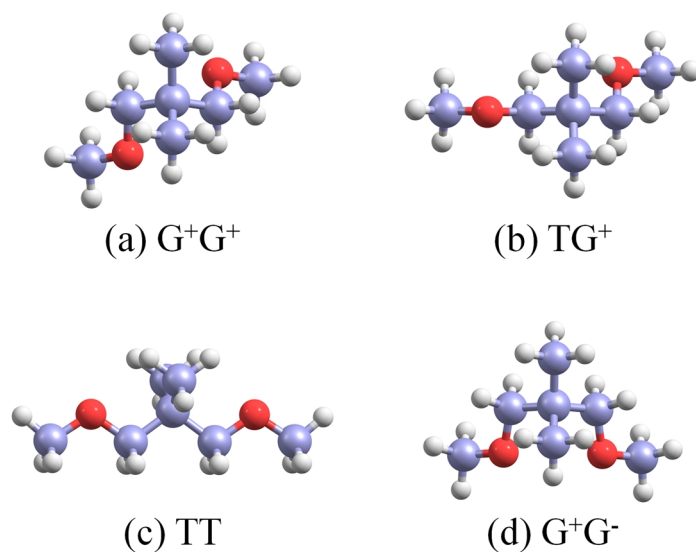

Fig. S7 Optimized structures of DMDOMe at four energy minima. Colour code: as mentioned above.

The conformational analysis of 2,2-methyl-1,3-dimethoxypropane (DMDOMe) shows that DMDOMe has four conformational minima corresponding to ( $G^+G^+$ ), ( $TG^+$ ), ( $TT$ ) and ( $G^+G^-$ ). The related conformational energies of the four molecule structures in Fig. S8 are  $0.0 \text{ kcal mol}^{-1}$ ,  $0.5 \text{ kcal mol}^{-1}$ ,  $1.3 \text{ kcal mol}^{-1}$ ,  $3.6 \text{ kcal mol}^{-1}$ , respectively.

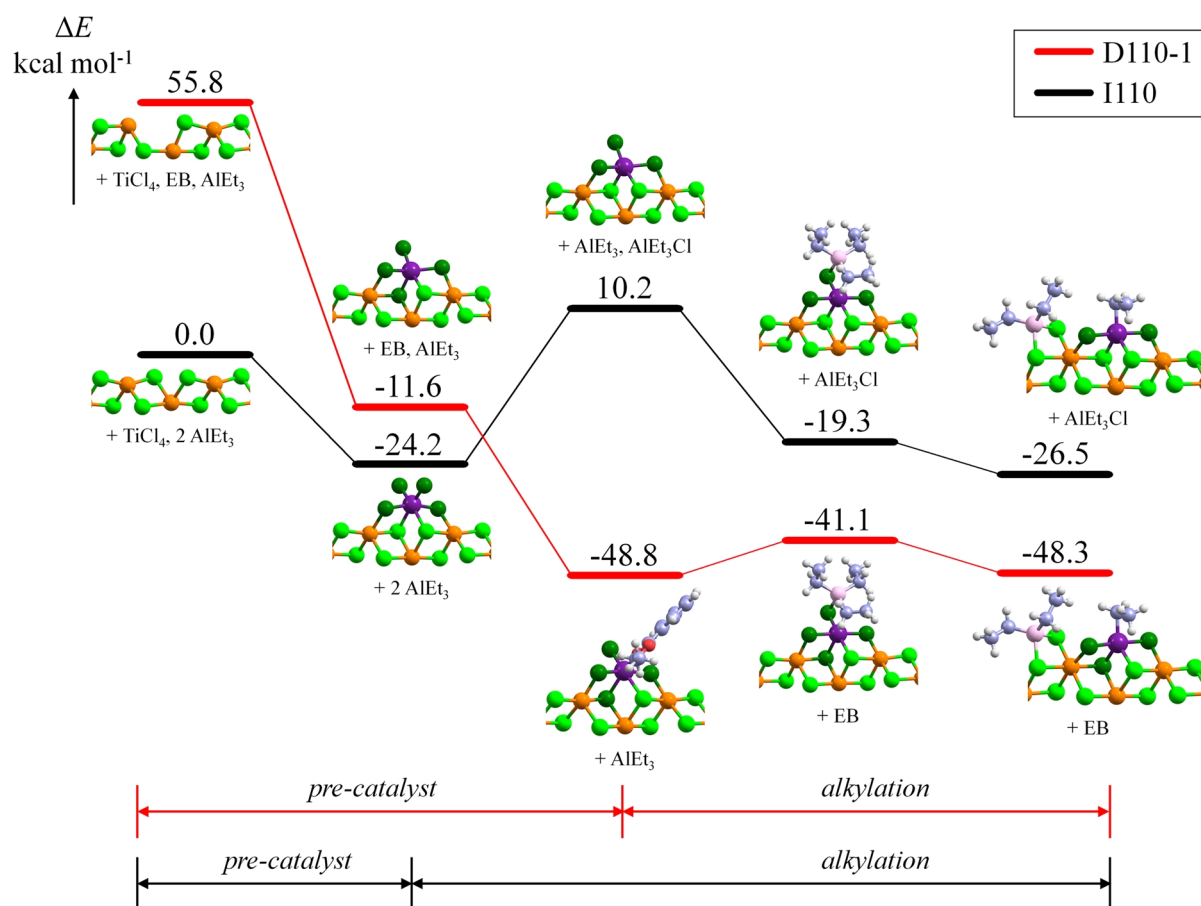

Fig. S8 The energy profile for a comparative study of forming the DEAC coordinated Ti active site on the I110 and D110-1 surfaces. Colour code: violet, Ti; dark green, Cl of the TiCl<sub>4</sub>; pink, Al; and others as mentioned above.

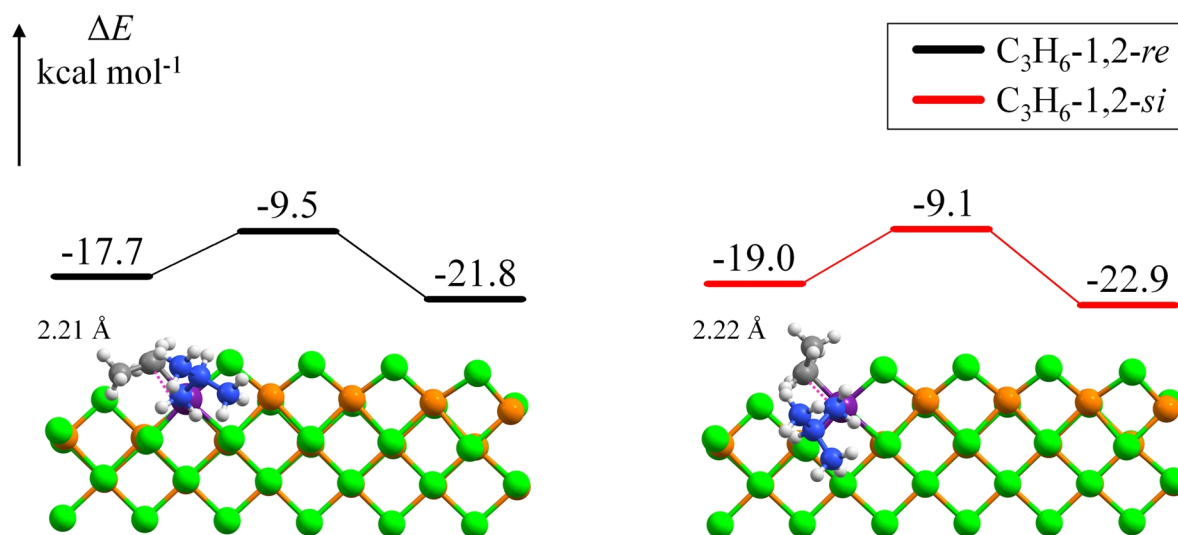

Fig. S9 The energy profile of propylene 1,2-insertion into the Ti-/Bu chain on the C104 surface and top view of transition states. Colour code: dark blue, C of the growing chain; dark gray, C of propylene; and others as mentioned above.
